# Supplementary material for: The PO13 crystal structure of ROY
Source: Royal Society of Chemistry journal article supplement (doi:10.1039/c8ce01930d), 2018-12-21
Supplement: c8ce01930d2.pdf [file c8ce01930d2.pdf]

## The PO13 crystal structure of ROY

Karen Gushurst<sup>1</sup>, Jonas Nyman<sup>2,3</sup>, Stephan X.M. Boerrigter<sup>1\*</sup>

<sup>1</sup>SSCI a division of Albany Molecular Research Inc., West Lafayette, IN 47906

<sup>2</sup>Small Molecule Design & Development, Eli Lilly and Company, Indianapolis, IN 46221

<sup>3</sup>School of Pharmacy, University of Wisconsin–Madison, Madison, WI 53705

\*corresponding author

### SUPPLEMENTAL MATERIALS.

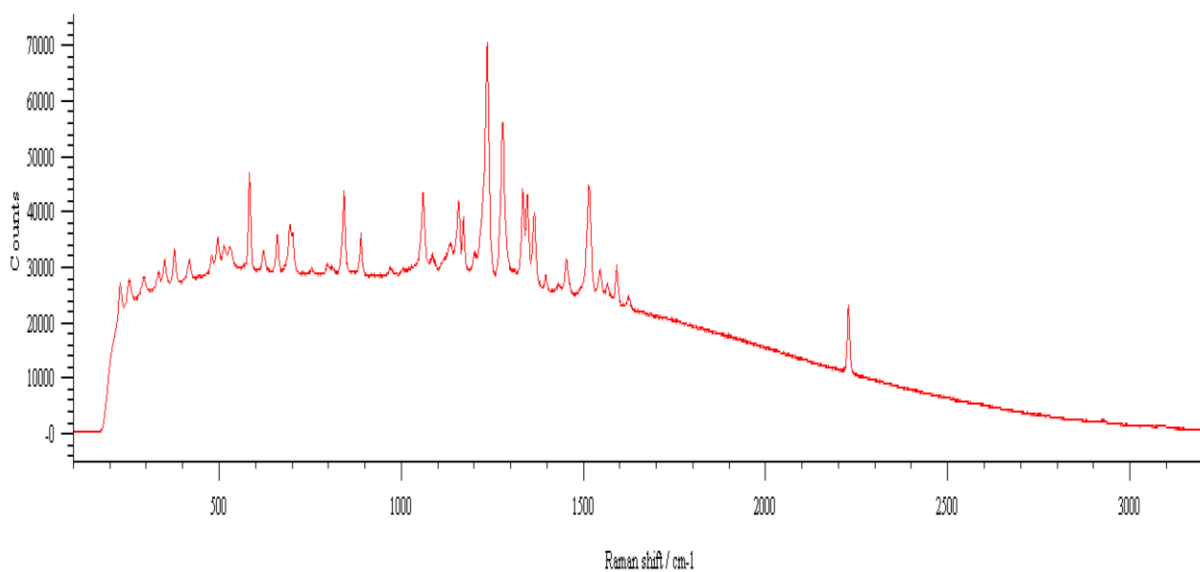

Text1: Acquisition1

Filename: 694973-1.wxd

Date: 2/10/2015 1:27:32 PM

Operator: A730083

Laser: Renishaw 785nm

BeamPath: Grating

Grating: 1200 l/mm (633/780)

Focus mode: Linefocus

Spectral range: 98.86 to

Acquisition time: 10

Accumulations: 1

Cosmic ray removal: False

Description: 340391, ROY, file 694973-1

**Figure S1.** Raman spectrum of ROY PO13.

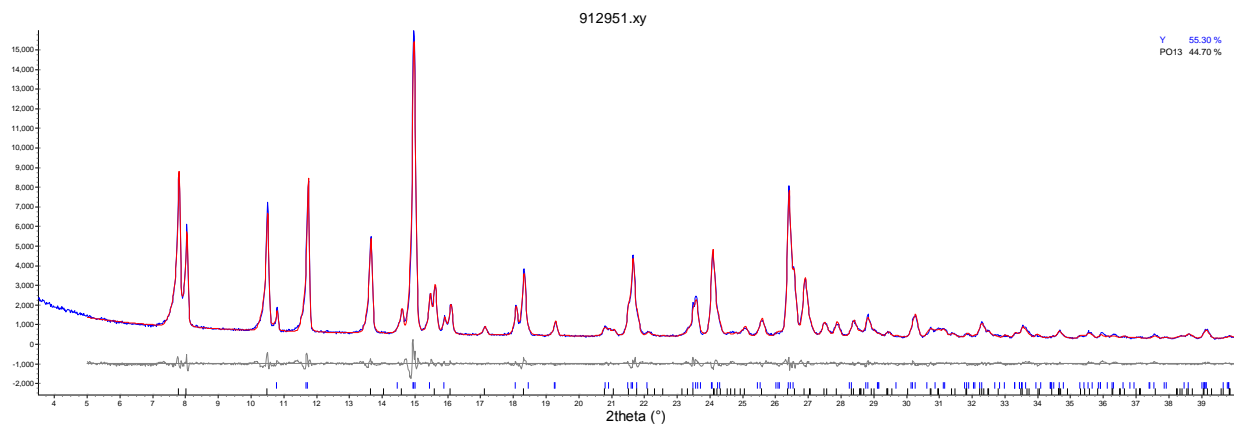

**Figure S2.** Rietveld refinement for the 2018 mixture of forms PO13 and Y. The fitted mixture ratio is PO13/Y = 55.30%/44.70%.

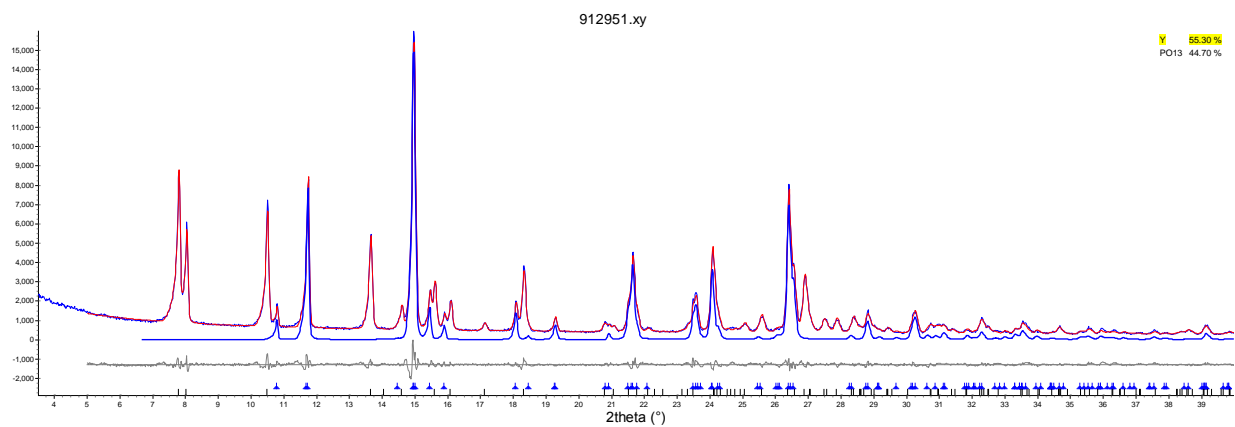

**Figure S3.** Rietveld refinement for the 2018 mixture of forms PO13 and Y. The contribution of Form Y is highlighted in blue.

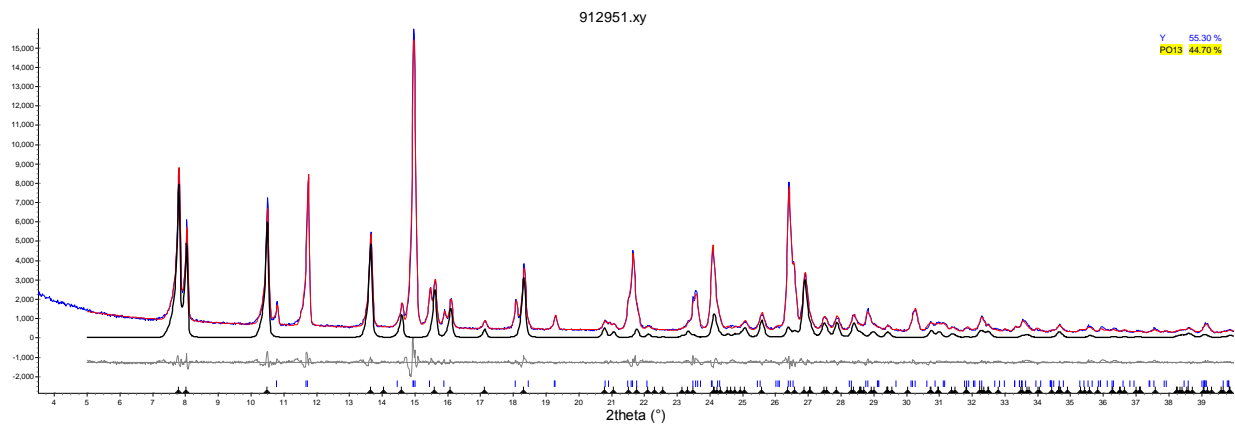

**Figure S4.** Rietveld refinement for the 2018 mixture of forms PO13 and Y. The contribution of Form PO13 is highlighted in black.
